# Supplementary material
Source: publisher figshare collection journal article supplement (https://diabetesjournals.figshare.com/articles/dataset/_/25438528)
Supplement: Supplementary file 2 [file 1]

## Supplements

### Supplemental Figure 1 – CONSORT Diagrams of Inclusion/Exclusion into Million Veteran Program (MVP) and VA Informatics and Computing Infrastructure (VINCI) Datasets

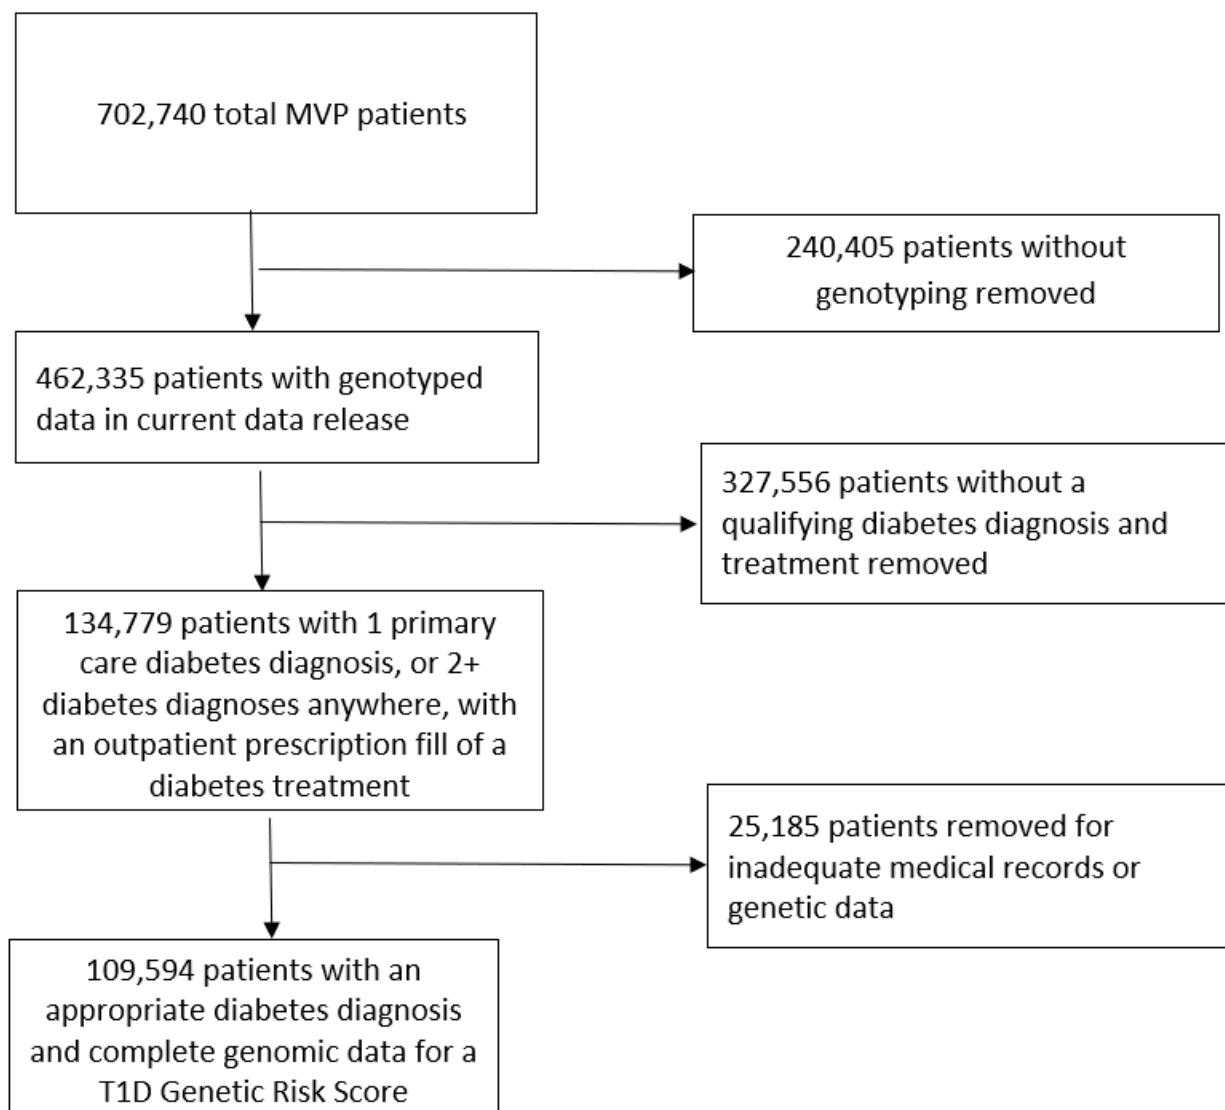

#### Supplemental Figure 1a – CONSORT Diagram of Million Veteran Program Inclusion/Exclusion.

Identification = MVP recruitment; Screening identified genotyped data availability; Eligibility entailed study criteria fulfillment; Included covered the final data.

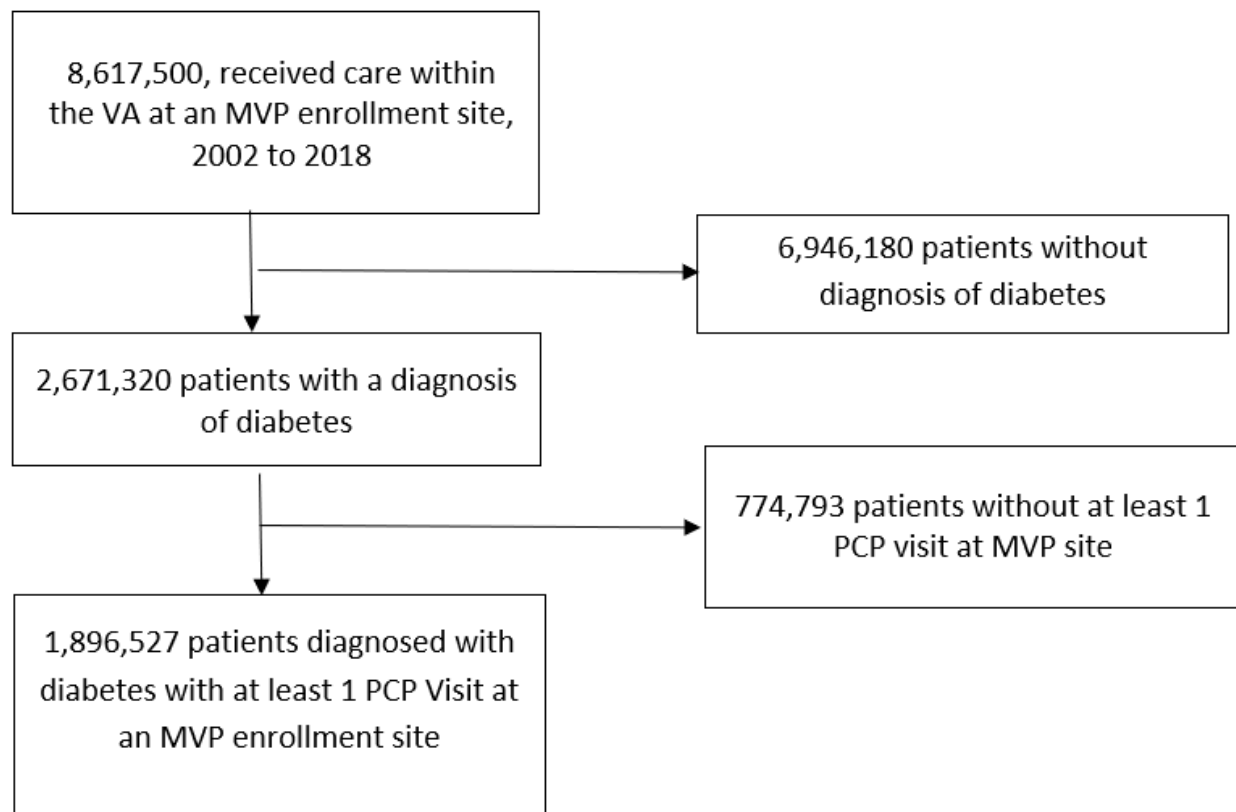

**Supplemental Figure 1b – CONSORT Diagram of VA Informatics and Computing Infrastructure (VINCI) Diabetes Inclusion/Exclusion.** Identification = Veterans Affairs Healthcare System participation; Screening identified diabetes diagnoses; Eligibility = study criteria fulfillment.

**Supplemental Table 1 - Racial-ethnic distributions across GRS score categories using University of Exeter GRS vs University of Exeter with University of Virginia for AFR Ancestry.**

|                       | UExeter All        | GRS Low            | GRS Med            | GRS High          | GRS Highest       | UExeter +<br>UVA AFR<br>All | GRS Low            | GRS Med            | GRS High          | GRS Highest       |
|-----------------------|--------------------|--------------------|--------------------|-------------------|-------------------|-----------------------------|--------------------|--------------------|-------------------|-------------------|
| GRS Groups            |                    | 0-<45%             | 45-<90%            | 90-<95%           | >=95%             |                             | 0-<45%             | 45-<90%            | 90-<95%           | >=95%             |
| <b>Total</b>          | 109,459            | 63,245             | 36,268             | 4,571             | 5375              | 109,594                     | 49,320             | 49,316             | 5,479             | 5,479             |
| <b>Race/Ethnicity</b> |                    |                    |                    |                   |                   |                             |                    |                    |                   |                   |
| EUR                   | 73,872<br>(67.49%) | 39,605<br>(62.62%) | 26,254<br>(72.39%) | 3,644<br>(79.72%) | 4,369<br>(81.28%) | 73,872<br>(67.41%)          | 34,337<br>(69.62%) | 32,440<br>(65.78%) | 3,538<br>(64.57%) | 3,557<br>(64.92%) |
| AFR                   | 25,139<br>(22.97%) | 19,219<br>(30.39%) | 5,500<br>(15.16%)  | 231<br>(5.05%)    | 189<br>(3.52%)    | 25,274<br>(23.06%)          | 11,376<br>(23.07%) | 11,372<br>(23.06%) | 1,263<br>(23.05%) | 1,263<br>(23.05%) |
| HIS                   | 9,537<br>(8.71%)   | 4,119<br>(6.51%)   | 3,983<br>(10.98%)  | 649<br>(14.20%)   | 786<br>(14.62%)   | 9,537<br>(8.70%)            | 3,429<br>(6.95%)   | 4,842<br>(9.82%)   | 630<br>(11.50%)   | 636 (11.61%)      |
| ASN                   | 911 (0.83%)        | 302<br>(0.48%)     | 531 (1.46%)        | 47 (1.03%)        | 31 (0.58%)        | 911<br>(0.83%)              | 178 (0.36%)        | 662 (1.34%)        | 48 (0.88%)        | 23 (0.42%)        |

**Supplemental Table 1 - Racial-ethnic distributions across GRS score categories using University of Exeter GRS vs University of Virginia.**

University of Exeter GRS was applied for all ancestry groups in both panels, except the right panel where a University of Virginia 7 SNP AFR Ancestry GRS was applied only to MVP AFR patients. Percentages represent column percentages of risk levels constructed by ventiles from the applied risk scores. EUR = non-Hispanic European Americans, AFR = non-Hispanic African Americans, HIS = Hispanic/Latino Americans, ASN = non-Hispanic Asian Americans.

**Supplemental Figure 2 - ROC Curves by GAD/C-Peptide in tested patients by Ancestry (n=7433)**

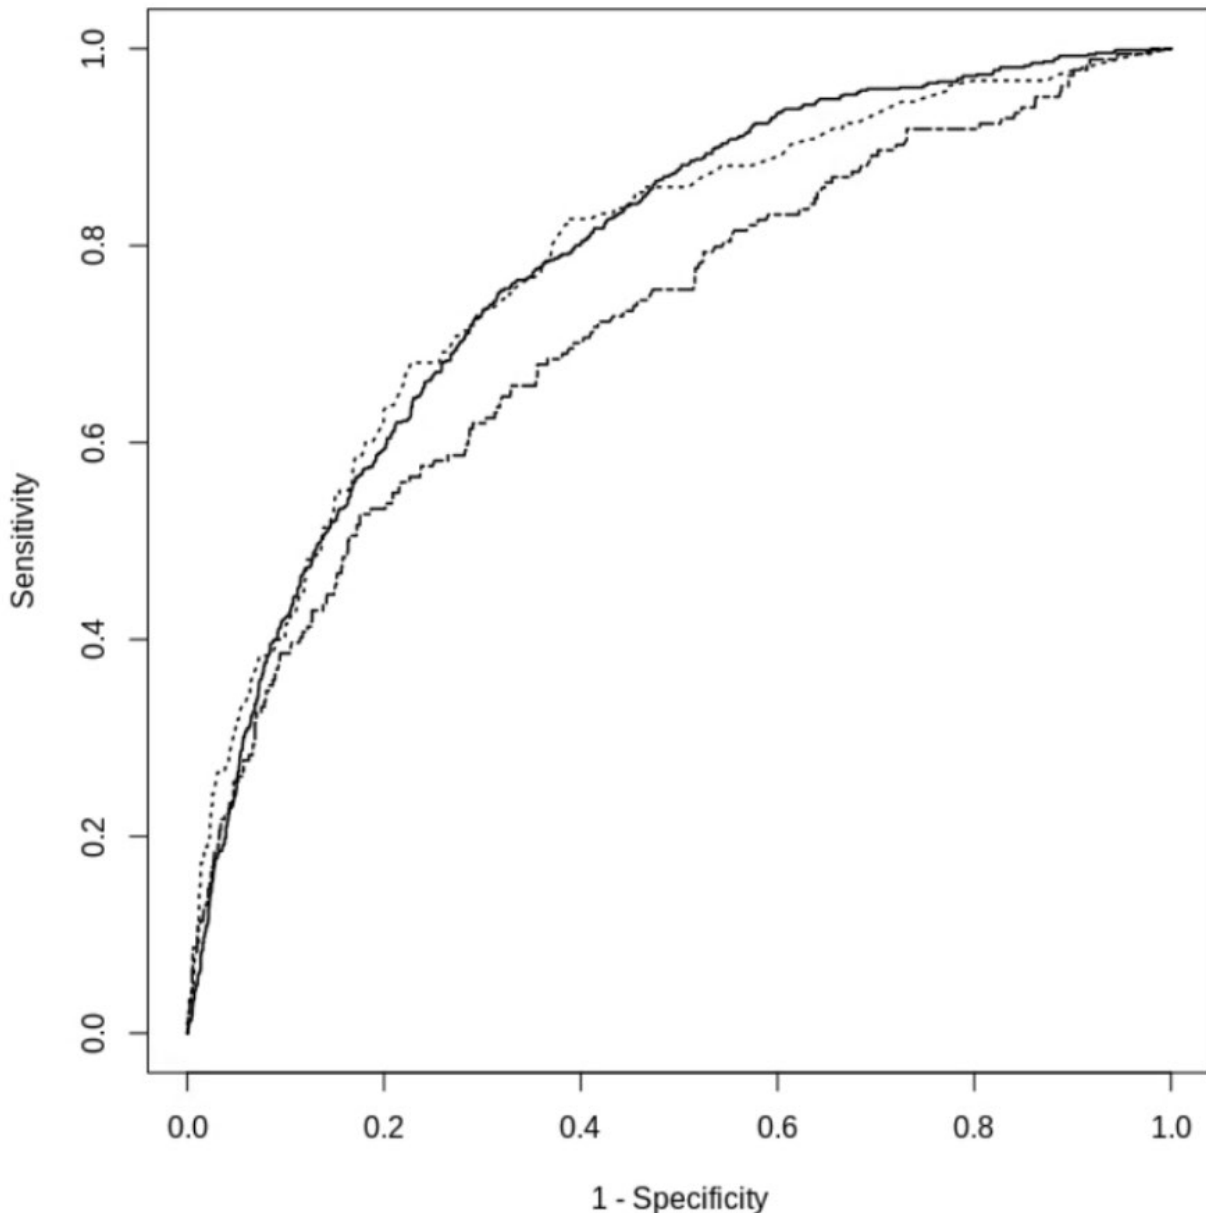

**Figure 2 - GRS and T1D test positivity in EUR (n=4277) and AFR (n=2173) Ancestry Patients.** HIS (n=766), and ASN Ancestry Patients (n=61) not included. EUR = non-Hispanic European Americans, AFR = non-Hispanic African Americans, HIS = Hispanic/Latino Americans, ASN = non-Hispanic Asian Americans. T1D test positivity determined by GAD Antibody level  $\geq 5.0$  IU/mL or C-peptide levels  $< 0.50$  ng/ml. Ancestry determined by HARE. EUR Ancestry UExeter GRS (Solid line) AUC = 0.784, AFR Ancestry UExeter EUR GRS (Long Dash) AUC = 0.718 (P Value for difference = 0.0045), AFR Ancestry UVA AFR GRS (Dotted Line) AUC = 0.782 (P Value compared to EUR = 0.9319).

**Supplemental Table 2 - Demographic and Clinical Characteristics of all Veterans with Diabetes in VA Electronic Health Records.**

|                                                                | <b>MVP</b>          | <b>All VA</b>   |
|----------------------------------------------------------------|---------------------|-----------------|
| No. of patients (had a PCP visit at an MVP recruitment site)   | 702,740             | 8,617,500       |
| No. with diabetes*                                             | 134,779             | 1,896,527       |
| Prevalence of diabetes*                                        | 29.15%              | 22.00%          |
| Follow-up time in years (mean, SD) <sup>†</sup>                | 11.99 (4.89)        | 8.9 (5.4)       |
| Follow-up time in years (median, 5% - 95% range) <sup>†</sup>  | 11.96 (4.30, 19.58) | 8.4 (1.1, 18.5) |
| Age at onset (mean, SD) <sup>†</sup>                           | 53.4 (9.62)         | 62.1 (11.4)     |
| BMI at onset (mean, SD) <sup>†</sup>                           | 33 (6.23)           | 32.0 (6.3)      |
| % Male <sup>†</sup>                                            | 95.3%               | 96.5%           |
| % White <sup>†</sup>                                           | 67.9%               | 65.9%           |
| % African-American <sup>†</sup>                                | 16.9%               | 16.6%           |
| % Other or Unknown Race <sup>†</sup>                           | 15.2%               | 17.5%           |
| % Treated with insulin <sup>†</sup>                            | 55.2%               | 45.3%           |
| Time to Insulin in years (mean, SD) <sup>†</sup>               | 4.29 (4.3)          | 3.7 (4.4)       |
| Time to insulin in years (median, 5% – 95% range) <sup>†</sup> | 3.2 (0.0, 12.7)     | 2.1 (0.0, 12.7) |
| % with ketoacidosis <sup>†</sup>                               | 1.3%                | 0.9%            |
| % with ED visit for hypoglycemia <sup>†</sup>                  | 4.0%                | 10.7%           |
| % with an outpatient RPG <50 mg/dL <sup>†</sup>                | 8.3%                | 15.3%           |

**Supplemental Table 2 - Demographic and Clinical Characteristics of all Veterans with Diabetes in VA Electronic Health Records.** Comparison to Million Veteran Program (MVP) Subset. \*Represents total MVP patients with diabetes, not 109,594 used in analysis. <sup>†</sup>Represents patients with diabetes and sufficient genomic data

**Supplemental Table 3 – ICD codes used in Electronic Health Record Identification of Diabetes and Cardiorenal Diagnoses.**

| Diagnosis                              | ICD Codes                                                                                                                                                                                                                                                                                                                                                                                                                                                                                                                                                                                                                                                                                                                                                                                                                                                                                                                                                                                                                                                                                                                                                                                                                                                                                                                                                                                                                                                                                                                                                                                                  |
|----------------------------------------|------------------------------------------------------------------------------------------------------------------------------------------------------------------------------------------------------------------------------------------------------------------------------------------------------------------------------------------------------------------------------------------------------------------------------------------------------------------------------------------------------------------------------------------------------------------------------------------------------------------------------------------------------------------------------------------------------------------------------------------------------------------------------------------------------------------------------------------------------------------------------------------------------------------------------------------------------------------------------------------------------------------------------------------------------------------------------------------------------------------------------------------------------------------------------------------------------------------------------------------------------------------------------------------------------------------------------------------------------------------------------------------------------------------------------------------------------------------------------------------------------------------------------------------------------------------------------------------------------------|
| Diabetes (Overall)                     | ICD-9: 250.XX*ICD-10: E08.XX, E09.XX, E10.XX, E11.XX, E12.XX, E13.XX                                                                                                                                                                                                                                                                                                                                                                                                                                                                                                                                                                                                                                                                                                                                                                                                                                                                                                                                                                                                                                                                                                                                                                                                                                                                                                                                                                                                                                                                                                                                       |
| Type 1 Diabetes                        | ICD-9: 250.01.XX, 250.03.XX, 250.11.XX, 250.13.XX, 250.21.XX, 250.23.XX, 250.31.XX, 250.33.XX, 250.41.XX, 250.43.XX, 250.51.XX, 250.53.XX, 250.61.XX, 250.63.XX, 250.71.XX, 250.73.XX, 250.81.XX, 250.83.XX, 250.91.XX, 250.93.XX; ICD-10: E10.XX                                                                                                                                                                                                                                                                                                                                                                                                                                                                                                                                                                                                                                                                                                                                                                                                                                                                                                                                                                                                                                                                                                                                                                                                                                                                                                                                                          |
| Heart Failure                          | ICD-9: 428.XX; ICD-10: I50.XX                                                                                                                                                                                                                                                                                                                                                                                                                                                                                                                                                                                                                                                                                                                                                                                                                                                                                                                                                                                                                                                                                                                                                                                                                                                                                                                                                                                                                                                                                                                                                                              |
| Hypertension                           | ICD-9: 401.XX to 406.XX; ICD-10: I10.XX, I11.XX, I12.XX, I13.XX, I15.XX, I67.4.XX, I16.XX                                                                                                                                                                                                                                                                                                                                                                                                                                                                                                                                                                                                                                                                                                                                                                                                                                                                                                                                                                                                                                                                                                                                                                                                                                                                                                                                                                                                                                                                                                                  |
| Chronic Obstructive Pulmonary Disorder | ICD-9: 490.XX, 491.XX, 492.XX, 493.2.XX, 496.XX, 494.XX, 495.XX; ICD-10: V81.3.XX, J40.XX to J45.XX, J47.XX, J67.XX                                                                                                                                                                                                                                                                                                                                                                                                                                                                                                                                                                                                                                                                                                                                                                                                                                                                                                                                                                                                                                                                                                                                                                                                                                                                                                                                                                                                                                                                                        |
| Coronary Artery Disease                | ICD-9: 410.XX to 415.XX; ICD-10: I20.XX to I26.XX                                                                                                                                                                                                                                                                                                                                                                                                                                                                                                                                                                                                                                                                                                                                                                                                                                                                                                                                                                                                                                                                                                                                                                                                                                                                                                                                                                                                                                                                                                                                                          |
| Chronic Kidney Disease                 | ICD-9: 403.01.XX, 403.11.XX, 403.91.XX, 404.02.XX, ; .03.XX, 404.1.XX, 404.9.XX, 584..XX, 585..XX, 586..XX, 792.5.XX; ICD-10: V42.0.XX, V45.1.XX, V56.0.XX, V56.1.XX, V56.2.XX, V56.3.XX, V56.8.XX, N18.XX                                                                                                                                                                                                                                                                                                                                                                                                                                                                                                                                                                                                                                                                                                                                                                                                                                                                                                                                                                                                                                                                                                                                                                                                                                                                                                                                                                                                 |
| Hyperlipidemia                         | ICD-9: 272.XX; ICD-10: E78.0.XX, E78.01.XX, E78.1.XX, E78.2.XX, E78.3.XX, E78.4.XX, E78.5.XX, E78.6.XX, E88.1.XX, E75.21.XX, E75.22.XX, E75.249.XX, E77.0.XX, E77.1.XX, E78.81.XX, E78.89.XX, E88.89.XX, E78.9.XX                                                                                                                                                                                                                                                                                                                                                                                                                                                                                                                                                                                                                                                                                                                                                                                                                                                                                                                                                                                                                                                                                                                                                                                                                                                                                                                                                                                          |
| Atrial Fibrillation                    | ICD-9: 427.31; ICD-10: I48.0.XX, I48.1.XX, I48.2.XX, I48.91.XX                                                                                                                                                                                                                                                                                                                                                                                                                                                                                                                                                                                                                                                                                                                                                                                                                                                                                                                                                                                                                                                                                                                                                                                                                                                                                                                                                                                                                                                                                                                                             |
| Peripheral Vascular Disease            | ICD-9: 440.XX, 441.XX, 442.XX, 443.XX, 444.XX, 447.XX, 451.XX, 452.XX, 453.XX, 557.XX; ICD-10: E08.51, E08.52, E09.51, E09.52, E10.51, E10.52, E11.51, E11.52, E13.51, E13.52, I67.0.XX, I70.XX, I71.00.XX, I71.01.XX, I71.02.XX, I71.03.XX, I71.1.XX, I71.2.XX, I71.3.XX, I71.4.XX, I71.5.XX, I71.6.XX, I71.8.XX, I71.9.XX, I72.0.XX, I72.1.XX, I72.2.XX, I72.3.XX, I72.4.XX, I72.5.XX, I72.6.XX, I72.8.XX, I72.9.XX, I73.00.XX, I73.01.XX, I73.1.XX, I73.81.XX, I73.89.XX, I73.9.XX, I74.01.XX, I74.09.XX, I74.10.XX, I74.11.XX, I74.19.XX, I74.2.XX, I74.3.XX, I74.4.XX, I74.5.XX, I74.8.XX, I74.9.XX, I77.0.XX, I77.1.XX, I77.2.XX, I77.3.XX, I77.4.XX, I77.5.XX, I77.6.XX, I77.70.XX, I77.71.XX, I77.72.XX, I77.73.XX, I77.74.XX, I77.75.XX, I77.76.XX, I77.77.XX, I77.79.XX, I77.810.XX, I77.811.XX, I77.812.XX, I77.819.XX, I77.89.XX, I77.9.XX, I79.0.XX, I79.1.XX, I79.8.XX, I80.00.XX, I80.01.XX, I80.02.XX, I80.03.XX, I80.10.XX, I80.11.XX, I80.12.XX, I80.13.XX, I80.201.XX, I80.202.XX, I80.203.XX, I80.209.XX, I80.211.XX, I80.212.XX, I80.213.XX, I80.219.XX, I80.221.XX, I80.222.XX, I80.223.XX, I80.229.XX, I80.231.XX, I80.232.XX, I80.233.XX, I80.239.XX, I80.291.XX, I80.292.XX, I80.293.XX, I80.299.XX, I80.3.XX, I80.8.XX, I80.9.XX, I81.XX, I82.XX, K55.011.XX, K55.012.XX, K55.019.XX, K55.021.XX, K55.022.XX, K55.029.XX, K55.031.XX, K55.032.XX, K55.039.XX, K55.041.XX, K55.042.XX, K55.049.XX, K55.051.XX, K55.052.XX, K55.059.XX, K55.061.XX, K55.062.XX, K55.069.XX, K55.1.XX, K55.30.XX, K55.31.XX, K55.32.XX, K55.33.XX, K55.8.XX, K55.9.XX, K76.5.XX, M31.8.XX, M31.9.XX |

**Supplemental Table 3 – ICD codes used in Electronic Health Record Identification of Diabetes and Cardiorenal Diagnoses.** List of ICD-9 and ICD-10 codes used to identify diabetes and cardiorenal

diagnoses within the VA healthcare system. \*.XX denotes the range of all numbers possible after the given code.

**Supplemental Table 4 - Distribution of T1D Genetic Risk Levels Across Ancestry Groups As Row Percentages.**

|              | All     | GRS Low            | GRS Med            | GRS High         | GRS Highest      |
|--------------|---------|--------------------|--------------------|------------------|------------------|
| <b>Total</b> | 109,594 | 49,320<br>(45.00%) | 49,316<br>(45.00%) | 5,479<br>(5.00%) | 5,479<br>(5.00%) |
| <b>HARE</b>  |         |                    |                    |                  |                  |
| EUR          | 73,872  | 34,337<br>(46.48%) | 32,440<br>(43.91%) | 3,538<br>(4.79%) | 3,557<br>(4.82%) |
| AFR          | 25,274  | 11,376<br>(45.01%) | 11,372<br>(44.99%) | 1,263<br>(5.00%) | 1,263<br>(5.00%) |
| HIS          | 9,537   | 3,429<br>(35.95%)  | 4,842<br>(50.77%)  | 630<br>(6.61%)   | 636<br>(6.67%)   |
| ASN          | 911     | 178 (19.54%)       | 662<br>(72.67%)    | 48<br>(5.27%)    | 23<br>(2.52%)    |

**Supplemental Table 4 - Distribution of Genetic Risk Levels Across HARE Groups As Row Percentages.**

Race/Ethnicity determined using HARE Algorithm. EUR = non-Hispanic European, AFR = non-Hispanic African, HIS = Hispanic/Latino, ASN = non-Hispanic Asian.

**Supplemental Table 5 -Demographic and Clinical Characteristics across GRS score categories using Wellcome Trust Centiles.**

|                                   | All               | GRS Low          | GRS Med           | GRS High          | GRS Highest       | <i>P Value</i> |
|-----------------------------------|-------------------|------------------|-------------------|-------------------|-------------------|----------------|
| Oram GRS cutoffs                  | (0.8552, 0.3429)  | (0.8552, 0.2340) | (0.2340, 0.2700)  | (0.2700, 0.2800)  | (0.2800, 0.3429)  |                |
| <b>Total</b>                      | 109,459           | 63,245           | 36,268            | 4,571             | 5,375             |                |
| <b>Sex</b>                        |                   |                  |                   |                   |                   | <0.0001        |
| Male                              | 104,231 (95.22%)  | 60,058 (94.96%)  | 34,662 (95.57%)   | 4,359 (95.36%)    | 5,152 (95.85%)    |                |
| Female                            | 5,228 (4.78%)     | 3,187 (5.04%)    | 1,606 (4.43%)     | 212 (4.64%)       | 223 (4.15%)       |                |
| <b>Age Category</b>               |                   |                  |                   |                   |                   |                |
| Age, Mean (SD)                    | 65.16 (9.83)      | 65.06 (9.72)     | 65.41 (9.88)      | 65.05 (10.20)     | 64.91 (10.47)     | <0.0001        |
| 20-29                             | 131 (0.12%)       | 55 (0.09%)       | 32 (0.09%)        | 12 (0.26%)        | 32 (0.60%)        | <0.0001        |
| 30-39                             | 1,219 (1.11%)     | 616 (0.97%)      | 433 (1.19%)       | 71 (1.55%)        | 99 (1.84%)        |                |
| 40-49                             | 5,346 (4.88%)     | 3,089 (4.88%)    | 1,753 (4.83%)     | 245 (5.36%)       | 259 (4.82%)       |                |
| 50-59                             | 19,453 (17.77%)   | 11,778 (18.62%)  | 6,016 (16.59%)    | 747 (16.34%)      | 912 (16.97%)      |                |
| 60-69                             | 52,253 (47.74%)   | 30,099 (47.59%)  | 17,382 (47.93%)   | 2,215 (48.46%)    | 2,557 (47.57%)    |                |
| 70-79                             | 22,426 (20.49%)   | 12,761 (20.18%)  | 7,675 (21.16%)    | 913 (19.97%)      | 1,077 (20.04%)    |                |
| 80+                               | 8575 (7.83%)      | 4810 (7.61%)     | 2960 (8.16%)      | 367 (8.03%)       | 438 (8.15%)       |                |
| <b>Race/Ethnicity<sup>†</sup></b> |                   |                  |                   |                   |                   | <0.0001        |
| EUR                               | 73,872 (67.49%)   | 39,605 (62.62%)  | 26,254 (72.39%)   | 3,644 (79.72%)    | 4,369 (81.28%)    |                |
| AFR                               | 25,139 (22.97%)   | 19,219 (30.39%)  | 5,500 (15.16%)    | 231 (5.05%)       | 189 (3.52%)       |                |
| HIS                               | 9,537 (8.71%)     | 4,119 (6.51%)    | 3,983 (10.98%)    | 649 (14.20%)      | 786 (14.62%)      |                |
| ASN                               | 911 (0.83%)       | 302 (0.48%)      | 531 (1.46%)       | 47 (1.03%)        | 31 (0.58%)        |                |
| <b>Diabetes-related Variables</b> |                   |                  |                   |                   |                   |                |
| Taking Insulin                    | 60,366 (55.15%)   | 34,489 (54.53%)  | 19,939 (54.98%)   | 2,619 (57.30%)    | 3,319 (61.75%)    | <0.0001        |
| Taking Sulfonylurea               | 76,228 (69.64%)   | 44,734 (70.73%)  | 25,100 (69.21%)   | 3,042 (66.55%)    | 3,352 (62.36%)    | <0.0001        |
| Diabetic Ketoacidosis             | 1,434 (1.31%)     | 674 (1.07%)      | 485 (1.34%)       | 88 (1.93%)        | 187 (3.48%)       | <0.0001        |
| Hypoglycemia Dx at ED             | 4,401 (4.02%)     | 2,507 (3.96%)    | 1,393 (3.84%)     | 205 (4.48%)       | 296 (5.51%)       | <0.0001        |
| Outpatient Glucose <50 mg/dL      | 9,096 (8.31%)     | 5,114 (8.09%)    | 2,902 (8.00%)     | 409 (8.95%)       | 671 (12.48%)      | <0.0001        |
| Years to Insulin (Median)         | 3.22 (3.17, 3.27) | 3.4 (3.32, 3.47) | 3.25 (3.15, 3.34) | 2.68 (2.41, 2.99) | 1.37 (1.15, 1.62) | <0.0001        |
| Years to Insulin (Mean)           | 3.29 (4.30)       | 4.4 (4.30)       | 4.3 (4.31)        | 3.99 (4.28)       | 3.38 (4.16)       | <0.0001        |



|                                       |                   |                   |                   |                   |                  |         |
|---------------------------------------|-------------------|-------------------|-------------------|-------------------|------------------|---------|
| Years to Sulfonylurea (Median)        | 0.51 (0.49, 0.53) | 0.51 (0.48, 0.53) | 0.52 (0.48, 0.54) | 0.53 (0.44, 0.67) | 0.5 (0.39, 0.57) | 0.525   |
| eGFR at Enrollment (Mean)             | 73.12 (26.17)     | 73.27 (26.15)     | 72.86 (26.50)     | 73.35 (24.72)     | 72.87 (25.11)    | 0.107   |
| A1c at Diabetes Onset (Mean)          | 7.74 (2.22)       | 7.75 (2.10)       | 7.72 (2.45)       | 7.71 (1.97)       | 7.84 (2.03)      | 0.0044  |
| BMI at Diabetes Onset (Mean)          | 33.01 (6.23)      | 33.08 (6.18)      | 33.05 (6.26)      | 32.86 (6.44)      | 32.07 (6.40)     | <0.0001 |
| Age at Diabetes Onset (Mean)          | 53.48 (9.62)      | 53.41 (9.51)      | 53.73 (9.64)      | 53.40 (9.96)      | 52.94 (10.43)    | <0.0001 |
| Years of follow-up (Mean)             | 11.99 (4.88)      | 11.96 (4.88)      | 12.00 (4.86)      | 11.96 (4.92)      | 12.29 (5.04)     | <0.0001 |
| <b>T1D Diagnostic</b>                 |                   |                   |                   |                   |                  |         |
| T1D ICD Code Any Use                  | 19,371 (17.70%)   | 10,475 (16.56%)   | 6,454 (17.8%)     | 954 (20.87%)      | 1,488 (27.68%)   | <0.0001 |
| T1D ICD Code at Least 50%             | 1,583 (1.45%)     | 404 (0.64%)       | 585 (1.61%)       | 156 (3.41%)       | 438 (8.15%)      | <0.0001 |
| GAD Tested                            | 2,627 (2.40%)     | 1,238 (1.96%)     | 892 (2.46%)       | 161 (3.52%)       | 336 (6.25%)      | <0.0001 |
| %Positive if GAD Tested <sup>†</sup>  | 517 (19.68%)      | 109 (8.80%)       | 206 (23.09%)      | 52 (32.30%)       | 150 (44.64%)     | <0.0001 |
| C-peptide Tested                      | 6,243 (5.70%)     | 3,312 (5.24%)     | 2,068 (5.70%)     | 318 (6.96%)       | 545 (10.14%)     | <0.0001 |
| %Low C-peptide If Tested <sup>‡</sup> | 547 (8.76%)       | 95 (2.87%)        | 208 (10.06%)      | 62 (19.50%)       | 182 (33.39%)     | <0.0001 |

**Supplemental Table 5 -Demographic and Clinical Characteristics across GRS score categories using Wellcome Trust Centiles.** \**P Values* determined to assess trend using ANOVA for continuous variables and Multinomial Cochrane-Armitage tests for categorical variables. <sup>†</sup>Race/Ethnicity determined using HARE Genetic Ancestry Algorithm. EUR = European, AFR = African, HIS = Admixed Hispanic/Latino, ASN = Asian. <sup>‡</sup>GAD Antibody level ≥5.0 IU/mL or C-peptide levels <0.50 ng/ml were indicative of Type 1 Diabetes. EUR = non-Hispanic European, AFR = non-Hispanic African, HIS = Hispanic/Latino, ASN = non-Hispanic Asian.

**Supplemental Table 6 – Demographic and Clinical Characteristics Across GRS Score Categories Stratified by HARE Ancestry**

**Supplemental Table 6a - Demographics and T1D Characteristics by HARE African Ancestry.**

|                                   | All                | GRS Low            | GRS Med            | GRS High          | GRS Highest       | P -Value* |
|-----------------------------------|--------------------|--------------------|--------------------|-------------------|-------------------|-----------|
| <b>Total</b>                      | 25,274             | 11,376             | 11,372             | 1,263             | 1,263             |           |
| <b>Sex</b>                        |                    |                    |                    |                   |                   | 0.1433    |
| Male                              | 23,327<br>(92.3%)  | 10,486<br>(92.18%) | 10,498<br>(92.31%) | 1,187<br>(93.98%) | 1,156<br>(91.53%) |           |
| Female                            | 1,949<br>(7.71%)   | 890 (7.82%)        | 874 (7.69%)        | 78 (6.18%)        | 107 (8.47%)       |           |
| <b>Age Category</b>               |                    |                    |                    |                   |                   |           |
| Age, Mean (SD)                    | 61.74 (9.65)       | 61.84 (9.65)       | 61.69 (9.58)       | 61.83 (9.82)      | 61.11 (10.07)     | 0.0704    |
| 20-29 (%)                         | 34 (0.13%)         | 14 (0.12%)         | 17 (0.15%)         | 2 (0.16%)         | 1 (0.08%)         | 0.3294    |
| 30-39 (%)                         | 383 (1.52%)        | 171 (1.50%)        | 165 (1.45%)        | 22 (1.74%)        | 25 (1.98%)        |           |
| 40-49 (%)                         | 2,005<br>(7.93%)   | 870 (7.65%)        | 907 (7.98%)        | 104 (8.23%)       | 124 (9.82%)       |           |
| 50-59 (%)                         | 7,431<br>(29.40%)  | 3,376<br>(29.68%)  | 3,335<br>(29.33%)  | 357<br>(28.27%)   | 363 (28.74%)      |           |
| 60-69 (%)                         | 10,971<br>(43.41%) | 4,923<br>(43.28%)  | 4,958<br>(43.60%)  | 562<br>(44.50%)   | 528 (41.81%)      |           |
| 70-79 (%)                         | 3,385<br>(13.39%)  | 1,519<br>(13.35%)  | 1,542<br>(13.56%)  | 149<br>(11.80%)   | 175 (13.86%)      |           |
| 80+ (%)                           | 1,044<br>(4.13%)   | 493 (4.33%)        | 439 (3.86%)        | 65 (5.15%)        | 47 (3.72%)        |           |
| <b>Diabetes-related Variables</b> |                    |                    |                    |                   |                   |           |
| Taking Insulin                    | 14,665<br>(58.02%) | 6,601<br>(58.03%)  | 6,520<br>(57.33%)  | 750<br>(59.38%)   | 794 (62.87%)      | 0.0015    |
| Taking Sulfonylurea               | 17,372<br>(68.73%) | 7,971<br>(70.07%)  | 7,727<br>(67.95%)  | 852<br>(67.46%)   | 822 (65.08%)      | <0.0001   |
| Diabetic Ketoacidosis             | 498 (1.97%)        | 175 (1.54%)        | 237 (2.08%)        | 32 (2.53%)        | 54 (4.28%)        | <0.0001   |
| Hypoglycemia Dx at ED             | 1,495<br>(5.92%)   | 645 (5.67%)        | 663 (5.83%)        | 93 (7.36%)        | 94 (7.44%)        | 0.0096    |
| Outpatient Glucose <50 mg/dL      | 3,067<br>(12.14%)  | 1,287<br>(11.31%)  | 1,405<br>(12.35%)  | 167<br>(13.22%)   | 208 (16.47%)      | <0.0001   |
| Years to Insulin (Median)         | 2.71 (2.55, 2.83)  | 2.89 (2.72, 3.03)  | 2.74 (2.52, 2.90)  | 2.06 (1.56, 2.55) | 1.81 (1.26, 2.22) | <0.0001   |
| Years to Insulin (Mean)           | 3.96 (4.24)        | 4.10 (4.30)        | 3.94 (4.21)        | 3.60 (4.16)       | 3.37 (3.99)       | <0.0001   |
| Years to Sulfonylurea (Median)    | 0.34 (0.30, 0.39)  | 0.33 (0.27, 0.40)  | 0.34 (0.29, 0.41)  | 0.48 (0.25, 0.73) | 0.35 (0.21, 0.51) | 0.394     |
| eGFR at Enrollment (Mean)         | 76.90 (30.22)      | 76.64<br>(28.63)   | 77.20<br>(32.07)   | 77.05<br>(28.86)  | 76.44 (28.49)     | 0.547     |
| A1c at Diabetes Onset (Mean)      | 8.21 (2.95)        | 8.18 (2.44)        | 8.18 (2.49)        | 8.34 (2.55)       | 8.59 (7.65)       | <0.0001   |
| BMI at Diabetes Onset (Mean)      | 32.40 (6.16)       | 32.44 (6.11)       | 32.44 (6.20)       | 32.03 (6.09)      | 31.93 (6.26)      | 0.008     |
| Age at Diabetes Onset (Mean)      | 49.98 (9.47)       | 50.04 (9.39)       | 49.99 (9.44)       | 50.07 (9.74)      | 49.23 (10.06)     | 0.0347    |

|                           |                   |                   |                   |                 |              |         |
|---------------------------|-------------------|-------------------|-------------------|-----------------|--------------|---------|
| Years of Follow-Up (Mean) | 12.07 (5.00)      | 12.12 (4.98)      | 12.01 (5.02)      | 12.07 (4.97)    | 12.19 (5.11) | 0.285   |
| <b>T1D Diagnostic</b>     |                   |                   |                   |                 |              |         |
| T1D ICD Code Any Use      | 4,725<br>(18.70%) | 2,030<br>(17.84%) | 2,092<br>(18.40%) | 283<br>(22.41%) | 320 (25.34%) | <0.0001 |
| T1D ICD Code at Least 50% | 263 (1.04%)       | 67 (0.59%)        | 122 (1.07%)       | 30 (2.38%)      | 44 (3.48%)   | <0.0001 |
| GAD Tested                | 800 (3.17%)       | 327 (2.87%)       | 350 (3.08%)       | 49 (3.88%)      | 74 (5.86%)   | 0.0027  |
| %Positive of GAD Tested†  | 107 (13.38%)      | 18 (5.50%)        | 47 (13.43%)       | 8 (16.33%)      | 34 (45.95%)  | <0.0001 |
| C-peptide Tested          | 1,877<br>(7.43%)  | 804 (7.07%)       | 822 (7.23%)       | 116 (9.18%)     | 135 (10.69%) | <0.0001 |
| %Low C-peptide If Tested† | 106 (5.65%)       | 6 (0.75%)         | 48 (5.84%)        | 16 (13.79%)     | 36 (26.67%)  | <0.0001 |

**Supplemental Table 6a - Demographics and T1D Characteristics by HARE African Ancestry.** \**P Values* determined to assess trend using ANOVA for continuous variables and Multinomial Cochrane-Armitage tests for categorical variables. †GAD Antibody level  $\geq 5.0$  IU/mL or C-peptide levels  $<0.50$  ng/ml were indicative of Type 1 Diabetes.

**Supplemental Table 6b - Demographics and T1D Characteristics by HARE European Ancestry.**

|                                   | All                | GRS Low            | GRS Med            | GRS High          | GRS Highest       | <i>P Value</i> * |
|-----------------------------------|--------------------|--------------------|--------------------|-------------------|-------------------|------------------|
| <b>Total</b>                      | 73,872             | 34,337             | 32,440             | 3,538             | 3,557             |                  |
| <b>Sex</b>                        |                    |                    |                    |                   |                   | 0.3244           |
| Male                              | 70,975<br>(96.08%) | 33,025<br>(96.18%) | 31,159<br>(96.05%) | 3,386<br>(95.70%) | 3,405<br>(95.73%) |                  |
| Female                            | 2,897<br>(3.92%)   | 1,312<br>(3.82%)   | 1,281<br>(3.95%)   | 152<br>(4.30%)    | 152 (4.27%)       |                  |
| <b>Age Category</b>               |                    |                    |                    |                   |                   |                  |
| Age, Mean (SD)                    | 66.68<br>(9.45)    | 66.85<br>(9.23)    | 66.74<br>(9.49)    | 65.70<br>(9.99)   | 65.44 (10.38)     | <0.0001          |
| 20-29 (%)                         | 65 (0.09%)         | 14 (0.04%)         | 20 (0.06%)         | 9 (0.25%)         | 22 (0.62%)        | <0.0001          |
| 30-39 (%)                         | 552<br>(0.75%)     | 204<br>(0.59%)     | 243<br>(0.75%)     | 47 (1.33%)        | 58 (1.63%)        |                  |
| 40-49 (%)                         | 2,605<br>(3.53%)   | 1,138<br>(3.31%)   | 1,147<br>(3.54%)   | 162<br>(4.58%)    | 158 (4.44%)       |                  |
| 50-59 (%)                         | 9,822<br>(13.30%)  | 4,418<br>(12.87%)  | 4,334<br>(13.36%)  | 520<br>(14.70%)   | 550 (15.46%)      |                  |
| 60-69 (%)                         | 36,358<br>(49.22%) | 17,069<br>(49.71%) | 15,845<br>(48.84%) | 1,750<br>(49.46%) | 1,694<br>(47.62%) |                  |
| 70-79 (%)                         | 17,442<br>(23.61%) | 8,243<br>(24.01%)  | 7,689<br>(23.70%)  | 744<br>(21.03%)   | 766 (21.54%)      |                  |
| 80+ (%)                           | 6,995<br>(9.47%)   | 3,232<br>(9.41%)   | 3,150<br>(9.71%)   | 305<br>(8.62%)    | 308 (8.66%)       |                  |
| <b>Diabetes-related Variables</b> |                    |                    |                    |                   |                   |                  |
| Taking Insulin                    | 39,970<br>(54.11%) | 18,129<br>(52.80%) | 1,754<br>(5.41%)   | 2,038<br>(57.60%) | 2,260<br>(63.54%) | <0.0001          |
| Taking Sulfonylurea               | 51,433<br>(69.62%) | 24,529<br>(71.44%) | 22,488<br>(69.32%) | 2,280<br>(64.44%) | 2,136<br>(60.05%) | <0.0001          |
| Diabetic Ketoacidosis             | 788<br>(1.07%)     | 247<br>(0.72%)     | 334<br>(1.03%)     | 83 (2.35%)        | 124 (3.49%)       | <0.0001          |

|                                       |                      |                      |                      |                      |                      |         |
|---------------------------------------|----------------------|----------------------|----------------------|----------------------|----------------------|---------|
| Hypoglycemia Dx at ED                 | 2,489<br>(3.37%)     | 1,040<br>(3.03%)     | 1,105<br>(3.41%)     | 148<br>(4.18%)       | 196 (5.51%)          | <0.0001 |
| Outpatient Glucose <50 mg/dL          | 5,357<br>(7.25%)     | 2,210<br>(6.44%)     | 2,365<br>(7.29%)     | 315<br>(8.90%)       | 467 (13.13%)         | <0.0001 |
| Years to Insulin (Median)             | 3.41 (3.34,<br>3.49) | 3.74 (3.62,<br>3.74) | 3.41 (3.28,<br>3.51) | 2.48 (2.17,<br>2.80) | 1.17 (0.94,<br>1.44) | <0.0001 |
| Years to Insulin (Mean)               | 4.41 (4.32)          | 4.61 (4.32)          | 4.39 (4.32)          | 3.93 (4.29)          | 3.26 (4.15)          | <0.0001 |
| Years to Sulfonylurea (Median)        | 0.57 (0.54,<br>0.60) | 0.60 (0.56,<br>0.64) | 0.55 (0.52,<br>0.59) | 0.63 (0.48,<br>0.80) | 0.52 (0.41,<br>0.64) | 0.872   |
| eGFR at Enrollment (Mean)             | 71.25<br>(24.18)     | 71.22<br>(24.31)     | 71.08<br>(24.05)     | 72.47<br>(24.09)     | 71.90 (24.11)        | 0.0070  |
| A1c at Diabetes Onset (Mean)          | 7.54 (1.87)          | 7.28 (1.85)          | 7.30 (1.88)          | 7.44 (1.86)          | 7.49 (1.93)          | <0.0001 |
| BMI at Diabetes Onset (Mean)          | 33.30<br>(6.26)      | 33.48<br>(6.17)      | 33.30<br>(6.28)      | 32.88<br>(6.49)      | 31.93 (6.45)         | <0.0001 |
| Age at Diabetes Onset (Mean)          | 55.01<br>(9.25)      | 55.25<br>(9.01)      | 55.07<br>(9.27)      | 54.02<br>(9.84)      | 53.35 (10.43)        | <0.0001 |
| Years of Follow-Up (Mean)             | 11.97<br>(4.82)      | 11.91<br>(4.80)      | 11.99<br>(4.81)      | 11.99<br>(4.85)      | 12.41 (5.03)         | <0.0001 |
| <b>T1D Diagnostic</b>                 |                      |                      |                      |                      |                      |         |
| T1D ICD Code Any Use                  | 13,057<br>(17.68%)   | 5,447<br>(15.86%)    | 5,711<br>(17.60%)    | 800<br>(22.61%)      | 1,099<br>(30.90%)    | <0.0001 |
| T1D ICD Code at Least 50%             | 1,242<br>(1.68%)     | 198<br>(0.58%)       | 529<br>(1.63%)       | 157<br>(4.44%)       | 358 (10.06%)         | <0.0001 |
| GAD Tested                            | 1,556<br>(2.11%)     | 499<br>(1.45%)       | 677<br>(2.09%)       | 130<br>(3.67%)       | 250 (7.03%)          | <0.0001 |
| %Positive of GAD Tested <sup>†</sup>  | 374<br>(24.04%)      | 41 (8.22%)           | 166<br>(24.52%)      | 50<br>(38.46%)       | 117 (46.80%)         | <0.0001 |
| C-peptide Tested                      | 3,648<br>(4.94%)     | 1,449<br>(4.22%)     | 1,574<br>(4.85%)     | 246<br>(6.95%)       | 379 (10.66%)         | <0.0001 |
| %Low C-peptide If Tested <sup>†</sup> | 423<br>(11.6%)       | 34 (2.35%)           | 179<br>(11.37%)      | 64<br>(26.02%)       | 146 (38.52%)         | 0.0002  |

**Supplemental Table 6b - Demographics and T1D Characteristics by HARE European Ancestry.** \*P Values determined to assess trend using ANOVA for continuous variables and Multinomial Cochrane-Armitage tests for categorical variables. <sup>†</sup>GAD Antibody level ≥5.0 IU/mL or C-peptide levels <0.50 ng/ml were indicative of Type 1 Diabetes.

**Supplemental Table 6c - Demographics and T1D Characteristics by HARE Admixed Hispanic/Latino Ancestry.**

|                     | All               | GRS Low          | GRS Med           | GRS High        | GRS Highest  | P-Value* |
|---------------------|-------------------|------------------|-------------------|-----------------|--------------|----------|
| <b>Total</b>        | 9,537             | 3,429            | 4,842             | 630             | 636          |          |
| <b>Sex</b>          |                   |                  |                   |                 |              | 0.9709   |
| Male                | 9,180<br>(96.26%) | 3,302<br>(96.3%) | 4,661<br>(96.26%) | 607<br>(96.35%) | 610 (95.91%) |          |
| Female              | 357<br>(3.74%)    | 127 (3.70%)      | 181<br>(3.74%)    | 23 (3.65%)      | 26 (4.09%)   |          |
| <b>Age Category</b> |                   |                  |                   |                 |              |          |

|                                      |                      |                      |                      |                      |                      |         |
|--------------------------------------|----------------------|----------------------|----------------------|----------------------|----------------------|---------|
| Age, Mean (SD)                       | 62.84<br>(10.18)     | 63.06 (9.98)         | 62.69<br>(10.21)     | 62.92<br>(10.27)     | 62.80<br>(10.90)     | 0.4465  |
| 20-29 (%)                            | 28 (0.29%)           | 7 (0.20%)            | 12 (0.25%)           | 5 (0.79%)            | 4 (0.63%)            | 0.3098  |
| 30-39 (%)                            | 240<br>(2.52%)       | 73 (2.13%)           | 129<br>(2.66%)       | 14 (2.22%)           | 24 (3.77%)           |         |
| 40-49 (%)                            | 645<br>(6.76%)       | 224 (6.53%)          | 339<br>(7.00%)       | 47 (7.46%)           | 35 (5.50%)           |         |
| 50-59 (%)                            | 2063<br>(21.63%)     | 731 (21.32%)         | 1070<br>(22.10%)     | 125<br>(19.84%)      | 137 (21.54%)         |         |
| 60-69 (%)                            | 4,607<br>(48.31%)    | 1,678<br>(48.94%)    | 2,307<br>(47.65%)    | 316<br>(50.16%)      | 306 (48.11%)         |         |
| 70-79 (%)                            | 1,472<br>(15.43%)    | 540 (15.75%)         | 753<br>(15.55%)      | 91<br>(14.44%)       | 88 (13.84%)          |         |
| 80+ (%)                              | 480<br>(5.03%)       | 174 (5.07%)          | 232<br>(4.79%)       | 32 (5.08%)           | 42 (6.60%)           |         |
| <b>Diabetes-related Variables</b>    |                      |                      |                      |                      |                      |         |
| Taking Insulin                       | 5,412<br>(56.75%)    | 1,935<br>(56.43%)    | 2,759<br>(56.98%)    | 346<br>(54.92%)      | 372 (58.49%)         | 0.5952  |
| Taking Sulfonylurea                  | 6,913<br>(72.49%)    | 2,495<br>(72.76%)    | 3,510<br>(72.49%)    | 468<br>(74.29%)      | 440 (69.18%)         | 0.2006  |
| Diabetic Ketoacidosis                | 143<br>(1.50%)       | 42 (1.22%)           | 68 (1.40%)           | 11 (1.75%)           | 22 (3.46%)           | 0.0003  |
| Hypoglycemia Dx at ED                | 402<br>(4.22%)       | 148 (4.32%)          | 201<br>(4.15%)       | 27 (4.29%)           | 26 (4.09%)           | 0.9824  |
| Outpatient Glucose <50 mg/dL         | 661<br>(6.93%)       | 217 (6.33%)          | 340<br>(7.02%)       | 42 (6.67%)           | 62 (9.75%)           | 0.0196  |
| Years to Insulin (Median)            | 3.24 (3.07,<br>3.41) | 3.41 (3.12,<br>3.76) | 3.24 (2.98,<br>3.46) | 3.07 (2.44,<br>3.97) | 2.68 (1.60,<br>3.26) | 0.141   |
| Years to Insulin (Mean)              | 4.31 (4.28)          | 4.43 (4.35)          | 4.27 (4.21)          | 4.41 (4.40)          | 3.91 (4.37)          | 0.141   |
| Years to Sulfonylurea (Median)       | 0.35 (0.30,<br>0.43) | 0.37 (0.27,<br>0.48) | 0.37 (0.28,<br>0.50) | 0.35 (0.14,<br>0.59) | 0.27 (0.12,<br>0.51) | 0.442   |
| eGFR at Enrollment (Mean)            | 77.37<br>(27.68)     | 76.51<br>(27.66)     | 77.89<br>(27.73)     | 78.03<br>(26.73)     | 77.36<br>(28.24)     | 0.166   |
| A1c at Diabetes Onset (Mean)         | 8.08 (2.23)          | 8.06 (2.24)          | 8.05 (2.20)          | 8.19 (2.24)          | 8.27 (2.36)          | 0.0948  |
| BMI at Diabetes Onset (Mean)         | 32.72<br>(6.10)      | 32.65 (6.01)         | 32.79<br>(6.16)      | 33.03<br>(6.36)      | 32.20 (5.88)         | 0.0835  |
| Age at Diabetes Onset (Mean)         | 51.17<br>(9.77)      | 51.37 (9.60)         | 51.04<br>(9.77)      | 51.20<br>(9.94)      | 51.14<br>(10.47)     | 0.512   |
| Years of Follow-Up (Mean)            | 11.99<br>(5.03)      | 12.00 (5.05)         | 11.97<br>(4.98)      | 12.02<br>(5.21)      | 11.99 (5.07)         | 0.989   |
| <b>T1D Diagnostic</b>                |                      |                      |                      |                      |                      |         |
| T1D ICD Code Any Use                 | 1,516<br>(15.90%)    | 526<br>(15.34%)      | 786<br>(16.23%)      | 88<br>(13.97%)       | 116 (18.24%)         | 0.1347  |
| T1D ICD Code at Least 50%            | 76 (0.80%)           | 13 (0.38%)           | 37 (0.76%)           | 7 (1.11%)            | 19 (2.99%)           | <0.0001 |
| GAD Tested                           | 244<br>(2.56%)       | 72 (2.10%)           | 127<br>(2.62%)       | 19 (3.02%)           | 26 (4.09%)           | 0.1606  |
| %Positive of GAD Tested <sup>†</sup> | 34<br>(13.93%)       | 3 (4.17%)            | 18<br>(14.17%)       | 5 (26.32%)           | 8 (30.77%)           | 0.0025  |
| C-peptide Tested                     | 676<br>(7.09%)       | 223 (6.50%)          | 349<br>(7.21%)       | 43 (6.83%)           | 61 (9.59%)           | 0.0120  |

|                                       |            |           |           |           |           |        |
|---------------------------------------|------------|-----------|-----------|-----------|-----------|--------|
| %Low C-peptide If Tested <sup>†</sup> | 17 (2.51%) | 4 (1.79%) | 8 (2.30%) | 0 (0.00%) | 5 (8.20%) | 0.0300 |
|---------------------------------------|------------|-----------|-----------|-----------|-----------|--------|

**Supplemental Table 6c - Demographics and T1D Characteristics by HARE Admixed Hispanic/Latino Ancestry.** \**P Values* determined to assess trend using ANOVA for continuous variables and Multinomial Cochrane-Armitage tests for categorical variables. <sup>†</sup>GAD Antibody level ≥5.0 IU/mL or C-peptide levels <0.50 ng/ml were indicative of Type 1 Diabetes.

**Supplemental Table 6d - Demographics and T1D Characteristics by HARE Asian Ancestry.**

|                                   | All                  | GRS Low              | GRS Med              | GRS High             | GRS Highest          | P-Value |
|-----------------------------------|----------------------|----------------------|----------------------|----------------------|----------------------|---------|
| <b>Total</b>                      | 911                  | 178                  | 662                  | 48                   | 23                   |         |
| <b>Sex</b>                        |                      |                      |                      |                      |                      | 0.0056  |
| Male                              | 880<br>(96.60%)      | 168<br>(94.38%)      | 646<br>(97.58%)      | 43 (89.58%)          | 23<br>(100.00%)      |         |
| Female                            | 31 (3.40%)           | 10 (5.62%)           | 16 (2.42%)           | 5 (10.42%)           | 0 (0.00%)            |         |
| <b>Age Category</b>               |                      |                      |                      |                      |                      |         |
| Age, Mean (SD)                    | 62.84<br>(10.18)     | 63.06 (9.98)         | 62.69<br>(10.21)     | 62.92<br>(10.27)     | 62.80<br>(10.90)     | 0.391   |
| 20-29 (%)                         | 6 (0.66%)            | 1 (0.56%)            | 5 (0.76%)            | 0 (0.00%)            | 0 (0.00%)            | 0.3695  |
| 30-39 (%)                         | 45 (4.94%)           | 11 (6.18%)           | 30 (4.53%)           | 3 (6.25%)            | 1 (4.35%)            |         |
| 40-49 (%)                         | 103<br>(11.31%)      | 21 (11.80%)          | 73<br>(11.03%)       | 6 (12.50%)           | 3 (13.04%)           |         |
| 50-59 (%)                         | 182<br>(19.98%)      | 36 (20.22%)          | 132<br>(19.94%)      | 8 (16.67%)           | 6 (26.09%)           |         |
| 60-69 (%)                         | 375<br>(41.16%)      | 81 (45.51%)          | 264<br>(39.88%)      | 22 (45.83%)          | 8 (34.78%)           |         |
| 70-79 (%)                         | 142<br>(15.59%)      | 22 (12.36%)          | 110<br>(16.62%)      | 6 (12.50%)           | 4 (17.39%)           |         |
| 80+ (%)                           | 58 (6.37%)           | 6 (3.37%)            | 48 (7.25%)           | 3 (6.25%)            | 1 (4.35%)            |         |
| <b>Diabetes-related Variables</b> |                      |                      |                      |                      |                      |         |
| Taking Insulin                    | 407<br>(44.68%)      | 85 (47.75%)          | 288<br>(43.50%)      | 22 (45.83%)          | 12 (52.17%)          | 0.6597  |
| Taking Sulfonylurea               | 612<br>(67.18%)      | 115<br>(64.61%)      | 451<br>(68.13%)      | 31 (64.58%)          | 15 (65.22%)          | 0.8035  |
| Diabetic Ketoacidosis             | 7 (0.77%)            | 0 (0.00%)            | 5 (0.76%)            | 1 (2.08%)            | 1 (4.35%)            | 0.9648  |
| Hypoglycemia Dx at ED             | 24 (2.63%)           | 3 (1.69%)            | 20 (3.02%)           | 1 (2.08%)            | 0 (0.00%)            | 0.6391  |
| Outpatient Glucose <50 mg/dL      | 33 (3.62%)           | 4 (2.25%)            | 27 (4.08%)           | 2 (4.17%)            | 0 (0.00%)            | 0.5195  |
| Years to Insulin (Median)         | 3.24 (3.07,<br>3.41) | 3.41 (3.12,<br>3.76) | 3.24 (2.98,<br>3.46) | 3.07 (2.44,<br>3.97) | 2.68 (1.60,<br>3.26) | 0.344   |
| Years to Insulin (Mean)           | 4.31 (4.28)          | 4.43 (4.35)          | 4.27 (4.21)          | 4.41 (4.40)          | 3.91 (4.37)          | 0.344   |
| Years to Sulfonylurea (Median)    | 0.35 (0.30,<br>0.43) | 0.37 (0.27,<br>0.48) | 0.37 (0.28,<br>0.50) | 0.35 (0.14,<br>0.59) | 0.27 (0.12,<br>0.51) | 0.994   |
| eGFR at Enrollment (Mean)         | 77.37<br>(27.68)     | 76.51<br>(27.66)     | 77.89<br>(27.73)     | 78.03<br>(26.73)     | 77.36<br>(28.24)     | 0.0671  |
| a1c at Enrollment (Mean)          | 7.76 (1.74)          | 7.74 (1.77)          | 7.77 (1.72)          | 7.72 (1.68)          | 7.78 (1.82)          | 0.858   |
| a1c at Diabetes Onset (Mean)      | 8.08 (2.23)          | 8.06 (2.24)          | 8.05 (2.20)          | 8.19 (2.24)          | 8.27 (2.36)          | 0.863   |

|                              |                 |              |                 |              |                  |        |
|------------------------------|-----------------|--------------|-----------------|--------------|------------------|--------|
| BMI at Enrollment (Mean)     | 32.46<br>(6.79) | 32.23 (6.24) | 32.64<br>(7.19) | 32.85 (6.60) | 32.03 (6.68)     | 0.977  |
| BMI at Diabetes Onset (Mean) | 32.72<br>(6.10) | 32.65 (6.01) | 32.79<br>(6.16) | 33.03 (6.36) | 32.20 (5.88)     | 0.936  |
| Age at Diabetes Onset (Mean) | 51.17<br>(9.77) | 51.37 (9.60) | 51.04<br>(9.77) | 51.20 (9.94) | 51.14<br>(10.47) | 0.492  |
| Years of Follow-Up (Mean)    | 11.99<br>(5.03) | 12.00 (5.05) | 11.97<br>(4.98) | 12.02 (5.21) | 11.99 (5.07)     | 0.623  |
| <b>T1D Diagnostic</b>        |                 |              |                 |              |                  |        |
| T1D Code Any Use             | 104<br>(11.42%) | 25 (14.04%)  | 68<br>(10.27%)  | 7 (14.58%)   | 4 (17.39%)       | 0.3392 |
| T1D Code at Least 50%        | 6 (0.66%)       | 2 (1.12%)    | 3 (0.45%)       | 1 (2.08%)    | 0 (0.00%)        | 0.4476 |
| GAD Tested                   | 32 (3.51%)      | 4 (2.25%)    | 23 (3.47%)      | 3 (6.25%)    | 2 (8.70%)        | 0.2674 |
| %Positive of GAD Tested      | 2 (6.25%)       | 0 (0.00%)    | 2 (8.70%)       | 0 (0.00%)    | 0 (0.00%)        | 0.8411 |
| C-peptide Tested             | 52 (5.71%)      | 10 (5.62%)   | 36 (5.44%)      | 4 (8.33%)    | 2 (8.7%)         | 0.8442 |
| %Positive of CPep Tested     | 2 (3.85%)       | 0 (0.00%)    | 2 (5.56%)       | 0 (0.00%)    | 0 (0.00%)        | 0.7384 |

**Supplemental Table 6d - Demographics and T1D Characteristics by HARE Asian Ancestry.** \**P* Values determined to assess trend using ANOVA for continuous variables and Multinomial Cochran-Armitage tests for categorical variables. GAD Antibody level  $\geq 5.0$  IU/mL or C-peptide levels  $<0.50$  ng/ml were indicative of Type 1 Diabetes.

**Supplemental Table 7 - Median Years to Hypoglycemia-Level Random Plasma Glucose Readings by Genetic Risk Levels.**

|             | <70 mg/dL         | <65 mg/dL         | <60 mg/dL         | <55 mg/dL         | <50 mg/dL         |
|-------------|-------------------|-------------------|-------------------|-------------------|-------------------|
| GRS Low     | 5.68 (5.59, 5.79) | 6.31 (6.17, 6.44) | 6.88 (6.75, 7.01) | 7.44 (7.26, 7.61) | 7.98 (7.80, 8.22) |
| GRS Med     | 5.62 (5.51, 5.71) | 6.18 (6.04, 6.28) | 6.77 (6.66, 6.90) | 7.12 (6.97, 7.27) | 7.49 (7.30, 7.71) |
| GRS High    | 5.26 (4.95, 5.49) | 5.78 (5.46, 6.09) | 6.39 (6.02, 7.07) | 6.96 (6.40, 7.44) | 7.27 (6.64, 7.72) |
| GRS Highest | 4.72 (4.49, 5.03) | 5.10 (4.81, 5.50) | 5.73 (5.36, 6.15) | 6.13 (5.63, 6.45) | 6.53 (6.14, 7.07) |

**Supplemental Table 7 - Median Years to Hypoglycemia-Level Random Plasma Glucose Readings by Genetic Risk Levels.** Median years to hypoglycemia reported with 95% confidence intervals. All *P*-Values  $<0.0001$  in tests for trend across glucose levels.

**Supplemental Table 8 - Mean Time to Insulin Across Genetic Risk Categories and GAD/C-Peptide Testing.**

|                                   | GAD not tested       | GAD tested and negative*      | GAD tested and positive*  |
|-----------------------------------|----------------------|-------------------------------|---------------------------|
| GRS Low                           | 4.53 (4.33)          | 2.60 (3.54)                   | 1.98 (3.00)               |
| GRS Med                           | 4.37 (4.30)          | 2.27 (3.42)                   | 1.02 (2.02)               |
| GRS High                          | 4.06 (4.32)          | 1.62 (2.92)                   | 1.23 (1.97)               |
| GRS Highest                       | 3.61 (4.23)          | 1.19 (2.25)                   | 0.88 (1.94)               |
| <b>Figure 2B: Time to Insulin</b> |                      |                               |                           |
|                                   | C-peptide not tested | C-peptide tested and not low* | C-peptide tested and low* |
| GRS Low                           | 4.56 (4.34)          | 3.50 (3.99)                   | 0.64 (1.62)               |
| GRS Med                           | 4.40 (4.32)          | 3.26 (3.83)                   | 0.81 (1.84)               |
| GRS High                          | 4.11 (4.34)          | 2.89 (3.61)                   | 0.58 (1.41)               |
| GRS Highest                       | 3.60 (4.26)          | 2.21 (3.22)                   | 0.58 (1.69)               |

**Supplemental Table 8 - Mean Time to Insulin Across Genetic Risk Categories and GAD/C-Peptide Testing.** Means reported with standard deviations. \*GAD Antibody level  $\geq 5.0$  IU/mL or C-peptide levels  $< 0.50$  ng/ml were indicative of Type 1 Diabetes.

**Supplemental Table 9 - Mean Time to Insulin by Genetic Risk for AFR and non-AFR Ancestries.**

|             | AFR         | Non-AFR     |
|-------------|-------------|-------------|
| GRS Low     | 4.10 (4.31) | 4.59 (4.32) |
| GRS Med     | 3.94 (4.21) | 4.38 (4.31) |
| GRS High    | 3.60 (4.16) | 4.00 (4.31) |
| GRS Highest | 3.37 (3.99) | 3.35 (4.18) |

**Supplemental Table 9 - Mean Time to Insulin by Genetic Risk for AFR and non-AFR Ancestries.** Means reported with standard deviations.



**Supplemental Table 10 - Demographic and Clinical Characteristics across GRS score categories in Patients Without Use of Insulin for 3 Months After Diabetes Onset.**

|                                   | All                | GRS Low            | GRS Med            | GRS High          | GRS Highest       | P-Value* |
|-----------------------------------|--------------------|--------------------|--------------------|-------------------|-------------------|----------|
| <b>Total</b>                      | 49,384             | 22,391             | 22,076             | 2,457             | 2,460             |          |
| <b>Sex</b>                        |                    |                    |                    |                   |                   | 0.1959   |
| Male                              | 47,090<br>(95.35%) | 21,346<br>(95.33%) | 21,077<br>(95.47%) | 2,342<br>(95.32%) | 2,325<br>(94.51%) |          |
| Female                            | 2,294<br>(4.65%)   | 1,045<br>(4.67%)   | 999<br>(4.53%)     | 115<br>(4.68%)    | 135<br>(5.49%)    |          |
| <b>Age Category</b>               |                    |                    |                    |                   |                   |          |
| Age, Mean (SD)                    | 64.29<br>(9.64)    | 64.48<br>(9.41)    | 64.29<br>(9.70)    | 63.60<br>(10.14)  | 63.31<br>(10.62)  | <0.0001  |
| 20-29                             | 76<br>(0.15%)      | 16<br>(0.07%)      | 28<br>(0.13%)      | 12<br>(0.49%)     | 20<br>(0.81%)     | <0.0001  |
| 30-39                             | 613<br>(1.24%)     | 215<br>(0.96%)     | 285<br>(1.29%)     | 49<br>(1.99%)     | 64<br>(2.60%)     |          |
| 40-49                             | 2,660<br>(5.39%)   | 1,177<br>(5.26%)   | 1,193<br>(5.40%)   | 141<br>(5.74%)    | 149<br>(6.06%)    |          |
| 50-59                             | 9,595<br>(19.43%)  | 4,315<br>(19.27%)  | 4,311<br>(19.53%)  | 499<br>(20.31%)   | 470<br>(19.11%)   |          |
| 60-69                             | 24,126<br>(48.85%) | 11,037<br>(49.29%) | 10,703<br>(48.48%) | 1,208<br>(49.17%) | 1,178<br>(47.89%) |          |
| 70-79                             | 9,307<br>(18.85%)  | 4,267<br>(19.06%)  | 4,196<br>(19.01%)  | 396<br>(16.12%)   | 448<br>(18.21%)   |          |
| 80+                               | 2,984<br>(6.04%)   | 1,355<br>(6.05%)   | 1,349<br>(6.11%)   | 149<br>(6.06%)    | 131<br>(5.33%)    |          |
| <b>Race/Ethnicity<sup>†</sup></b> |                    |                    |                    |                   |                   | 0.0025   |
| EUR                               | 32,582<br>(65.98%) | 15,238<br>(68.05%) | 14,244<br>(64.52%) | 1,558<br>(63.41%) | 1,542<br>(62.68%) |          |
| AFR                               | 11,987<br>(24.27%) | 5,478<br>(24.47%)  | 5,304<br>(24.03%)  | 595<br>(24.22%)   | 610<br>(24.80%)   |          |
| HIS                               | 4,474<br>(9.06%)   | 1,604<br>(7.16%)   | 2,282<br>(10.34%)  | 289<br>(11.76%)   | 299<br>(12.15%)   |          |
| ASN                               | 341<br>(0.69%)     | 71<br>(0.32%)      | 246<br>(1.11%)     | 15<br>(0.61%)     | 9 (0.37%)         |          |
| <b>Diabetes-related Variables</b> |                    |                    |                    |                   |                   |          |
| Taking Insulin                    | 50,384<br>(100%)   | 23,391<br>(100%)   | 22,076<br>(100%)   | 2,457<br>(100%)   | 2,460<br>(100%)   | 0.0002   |
| Taking Sulfonylurea               | 40,150<br>(81.30%) | 18,485<br>(82.56%) | 17,905<br>(81.11%) | 1,906<br>(77.57%) | 1,854<br>(75.37%) | <0.0001  |
| Diabetic Ketoacidosis             | 957<br>(1.94%)     | 353<br>(1.58%)     | 424<br>(1.92%)     | 79<br>(3.22%)     | 101<br>(4.11%)    | <0.0001  |
| Hypoglycemia Dx at ED             | 2,587<br>(5.24%)   | 1,139<br>(5.09%)   | 1,161<br>(5.26%)   | 151<br>(6.15%)    | 136<br>(5.53%)    | 0.1359   |
| Outpatient Glucose <50 mg/dL      | 5,220<br>(10.57%)  | 2,269<br>(10.13%)  | 2,340<br>(10.60%)  | 283<br>(11.52%)   | 328<br>(13.33%)   | <0.0001  |

|                                       |                   |                   |                   |                   |                   |         |
|---------------------------------------|-------------------|-------------------|-------------------|-------------------|-------------------|---------|
| Years to Insulin (Median)             | 4.57 (4.53, 4.63) | 4.67 (4.59, 4.76) | 4.60 (4.53, 4.68) | 4.23 (4.03, 4.49) | 3.74 (3.48, 4.04) | <0.0001 |
| Years to Insulin (Mean)               | 5.24 (4.21)       | 5.33 (4.21)       | 5.24 (4.19)       | 5.00 (4.25)       | 4.68 (4.22)       |         |
| Years to Sulfonylurea (Median)        | 0.21 (0.19, 0.23) | 0.22 (0.19, 0.24) | 0.20 (0.17, 0.22) | 0.27 (0.19, 0.34) | 0.21 (0.14, 0.28) | 0.6550  |
| eGFR at Enrollment (Mean)             | 71.56 (27.23)     | 71.21 (27.03)     | 71.56 (27.47)     | 72.88 (26.79)     | 83.34 (27.26)     | 0.0003  |
| A1c at Diabetes Onset (Mean)          | 8.19 (2.29)       | 8.14 (2.26)       | 8.20 (2.31)       | 8.24 (2.80)       | 8.39 (2.33)       | <0.0001 |
| BMI at Diabetes Onset (Mean)          | 33.11 (6.29)      | 33.34 (6.25)      | 33.05 (6.29)      | 32.72 (6.37)      | 31.87 (6.36)      | <0.0001 |
| Age at Diabetes Onset (Mean)          | 51.46 (9.28)      | 51.62 (9.11)      | 51.46 (9.31)      | 50.95 (9.64)      | 50.56 (10.09)     | <0.0001 |
| Years of follow-up (Mean)             | 13.14 (4.60)      | 13.17 (4.59)      | 13.14 (4.59)      | 12.94 (4.71)      | 13.07 (4.67)      | 0.1040  |
| <b>T1D Diagnostic</b>                 |                   |                   |                   |                   |                   |         |
| T1D ICD Code Any Use                  | 13,561 (27.46%)   | 5,955 (26.60%)    | 6,023 (27.28%)    | 747 (30.40%)      | 836 (33.98%)      | <0.0001 |
| T1D ICD Code at Least 50%             | 594 (1.20%)       | 122 (0.54%)       | 259 (1.17%)       | 72 (2.93%)        | 141 (5.73%)       | <0.0001 |
| GAD Tested                            | 1,694 (3.43%)     | 620 (2.77%)       | 760 (3.44%)       | 125 (5.09%)       | 189 (7.68%)       | <0.0001 |
| %Positive of GAD Tested <sup>‡</sup>  | 306 (18.06%)      | 42 (6.77%)        | 135 (17.76%)      | 45 (36.00%)       | 84 (44.44%)       | <0.0001 |
| C-peptide Tested                      | 4,084 (8.27%)     | 1,709 (7.63%)     | 1,808 (8.19%)     | 250 (10.18%)      | 317 (12.89%)      | <0.0001 |
| %Low C-peptide If Tested <sup>‡</sup> | 218 (5.34%)       | 22 (1.29%)        | 93 (5.14%)        | 33 (13.20%)       | 70 (22.08%)       | <0.0001 |

**Supplemental Table 10 - Demographic and Clinical Characteristics across GRS score categories in Patients Without Use of Insulin for 3 Months After Diabetes Onset.** \**P Values* determined to assess trend using ANOVA for continuous variables and Multinomial Cochrane-Armitage tests for categorical variables. <sup>†</sup>Race/Ethnicity determined using HARE Algorithm. EUR = non-Hispanic European, AFR = non-Hispanic African, HIS = Hispanic/Latino, ASN = non-Hispanic Asian. <sup>‡</sup>GAD Antibody level  $\geq 5.0$  IU/mL or C-peptide levels  $<0.50$  ng/ml were indicative of Type 1 Diabetes.
